# Supplementary material for: IL-1β and TNF-α Modulation of Proliferated and Committed Myoblasts: IL-6 and COX-2-Derived Prostaglandins as Key Actors in the Mechanisms Involved
Source: Cells. 2020 Sep 1;9(9):2005. doi: 10.3390/cells9092005 (PMC7564831; doi:10.3390/cells9092005)
Supplement: Supplementary file 1 [file cells-09-02005-s001.pdf]

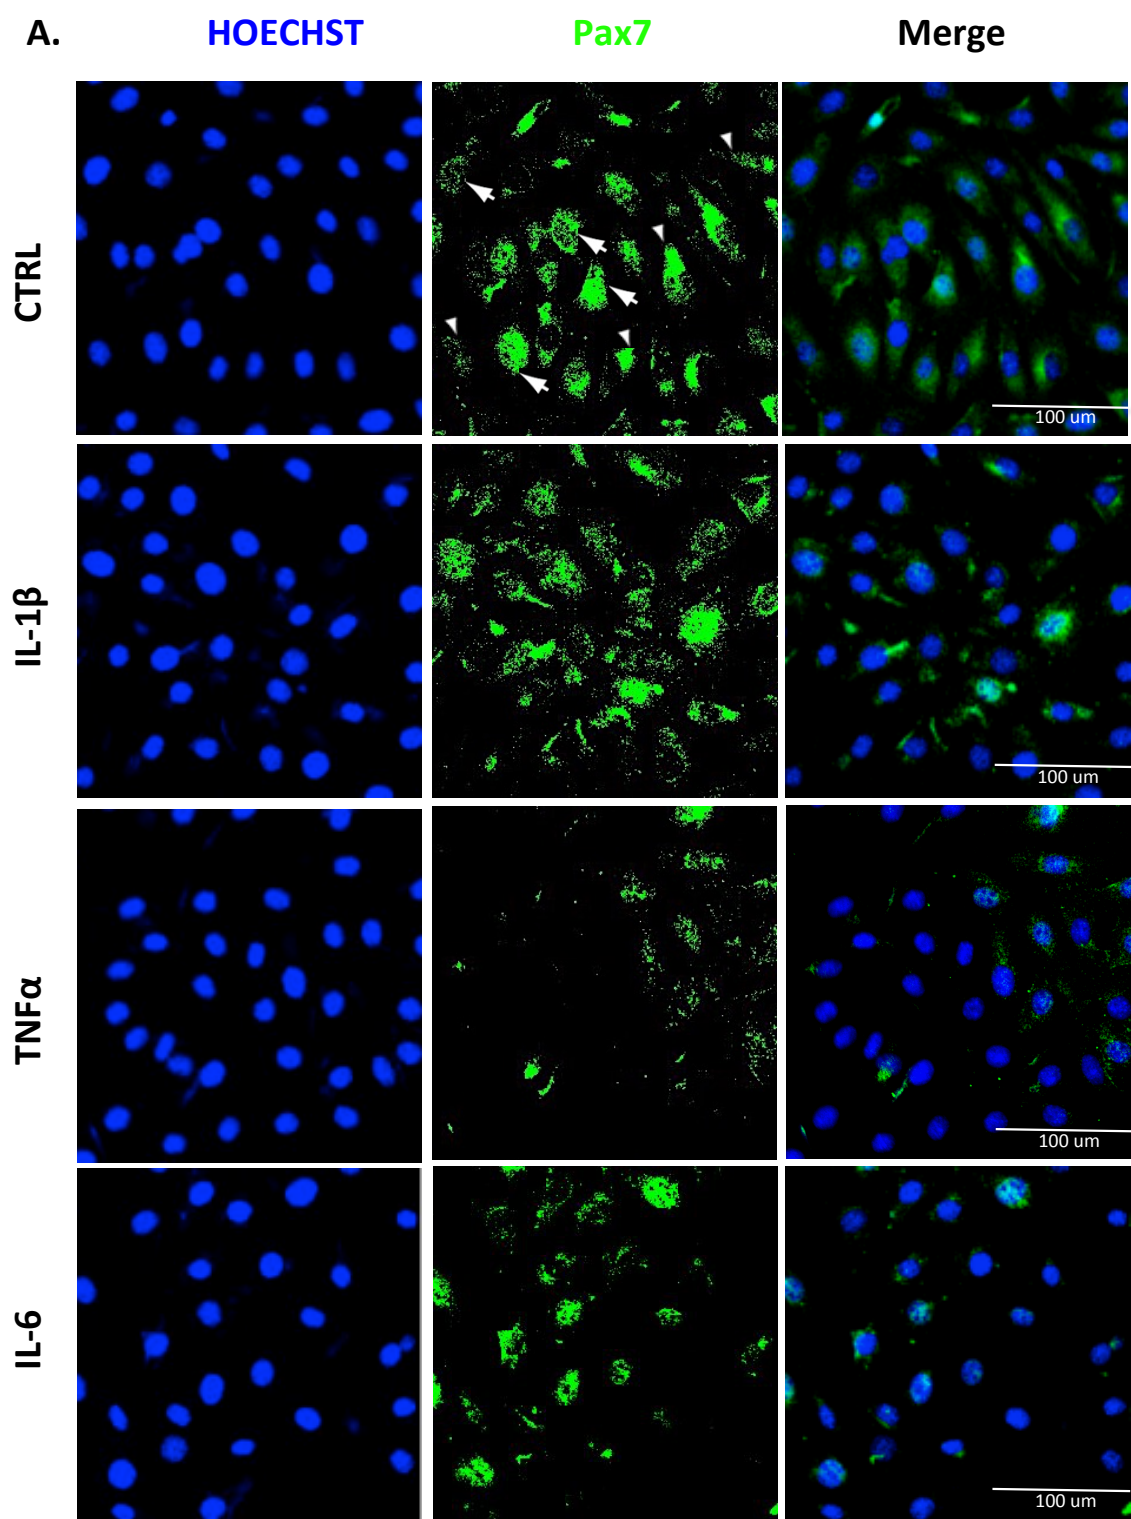

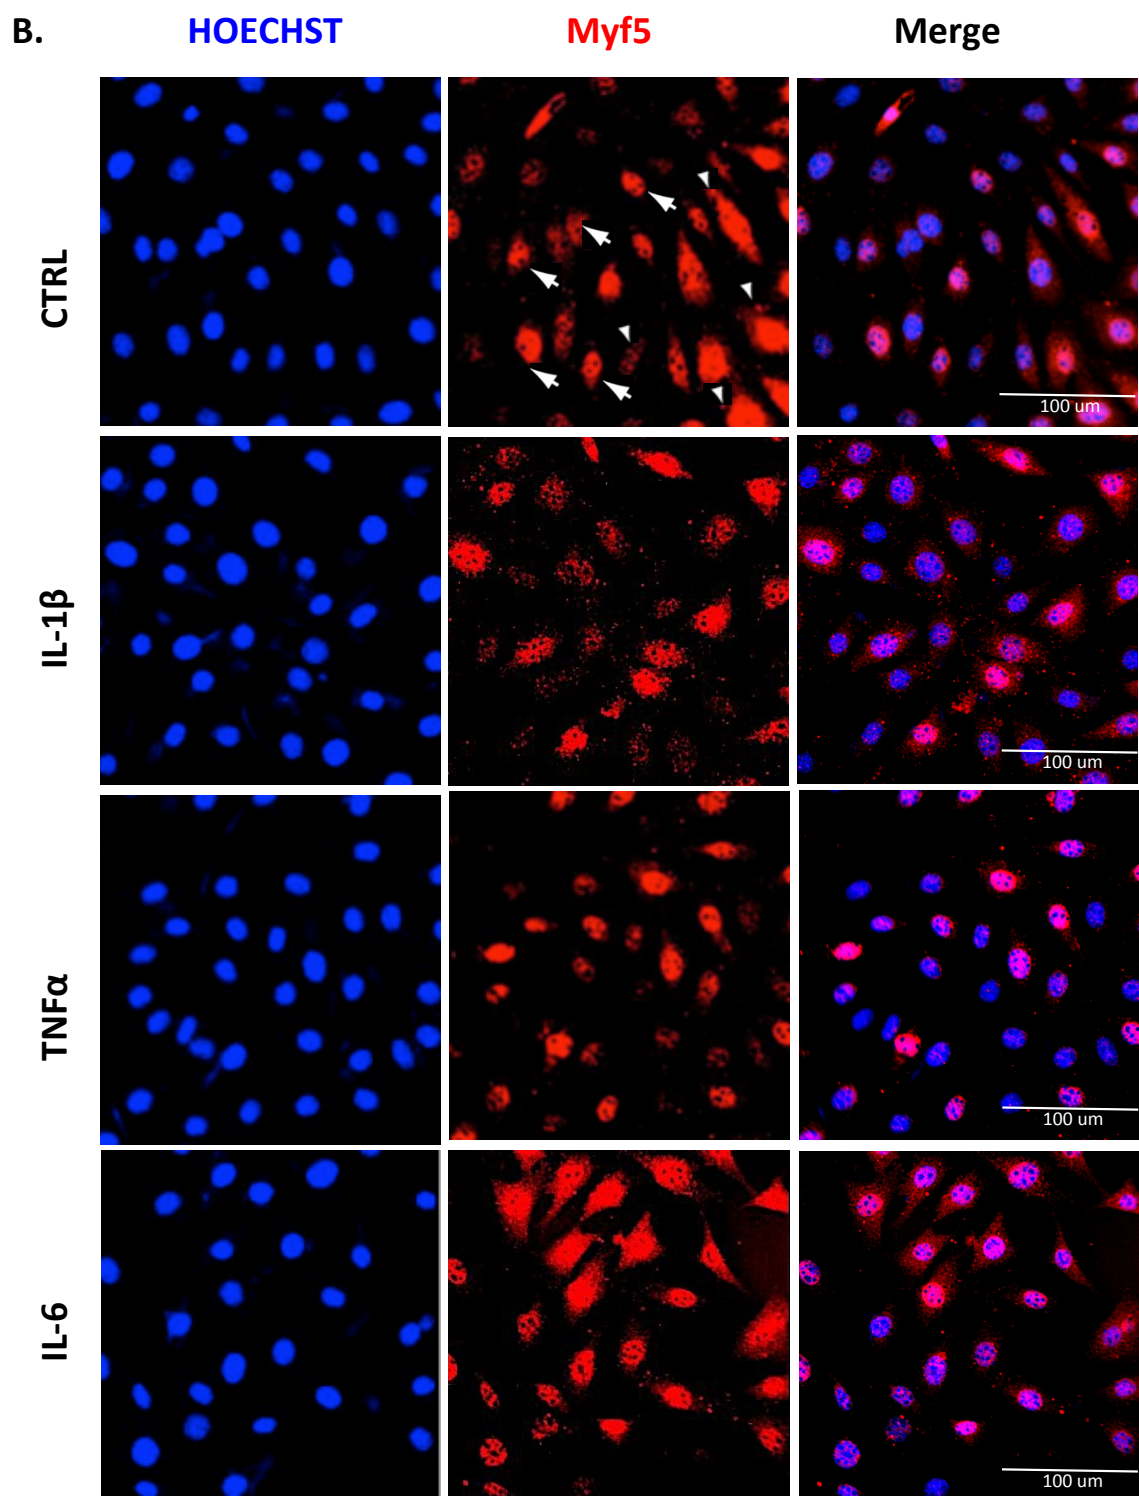

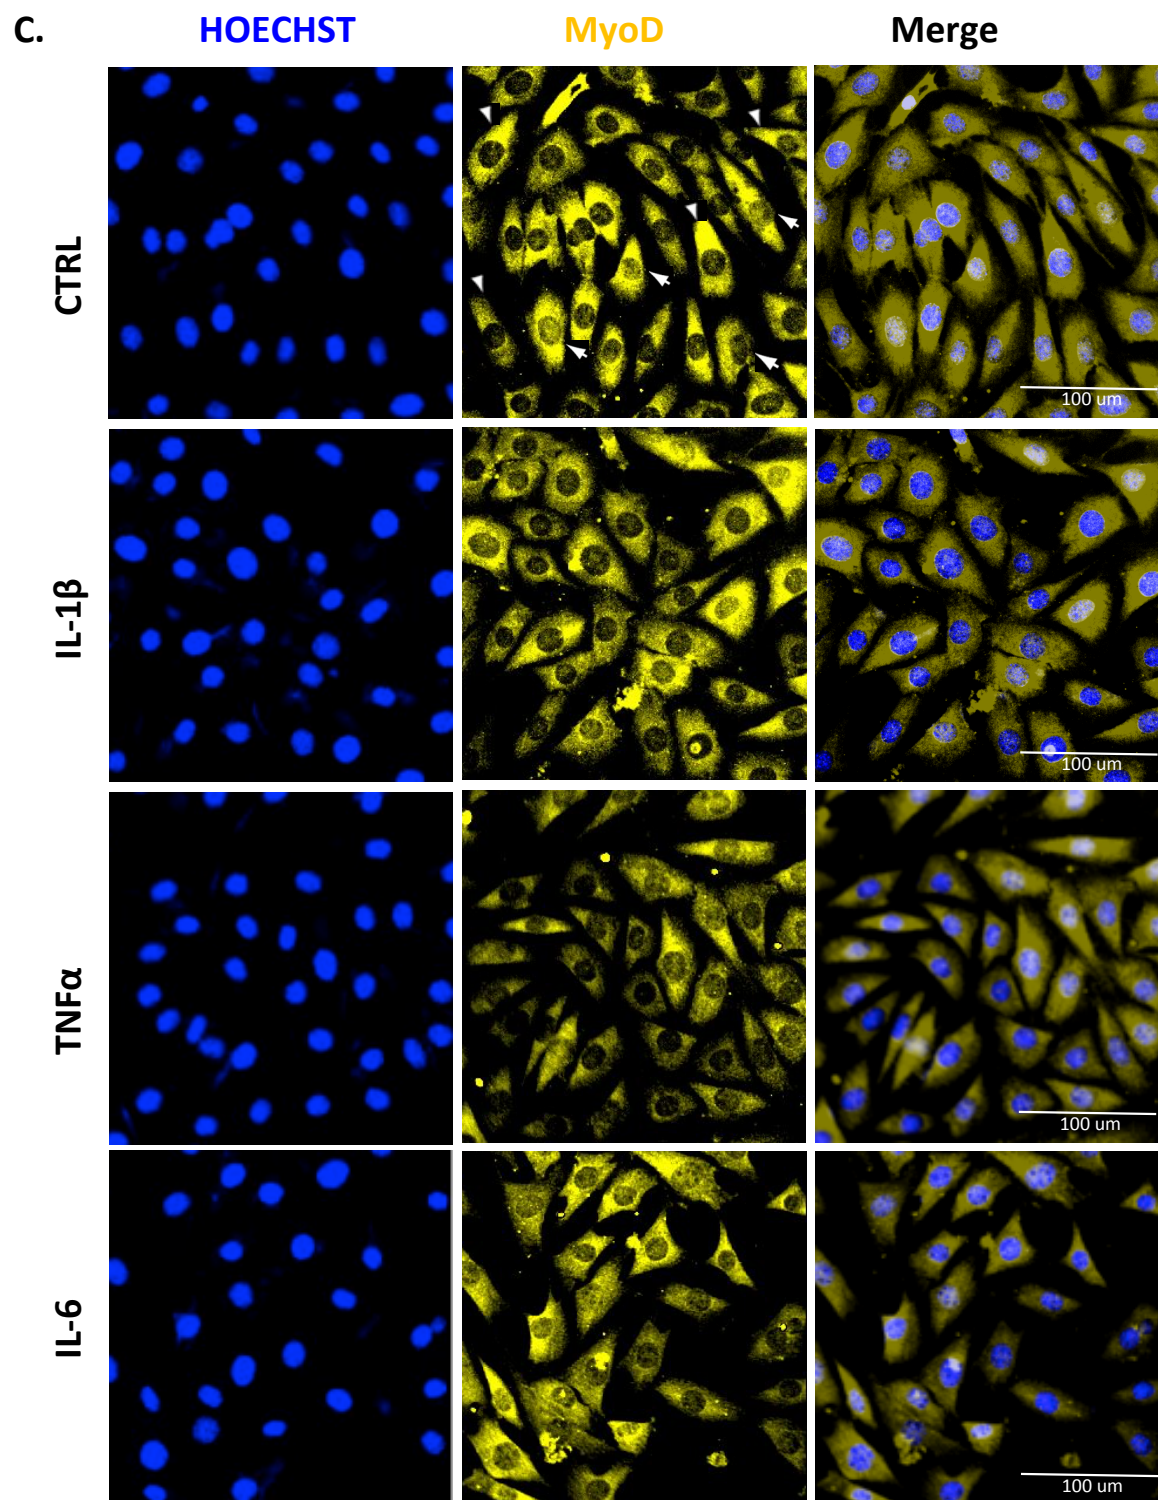

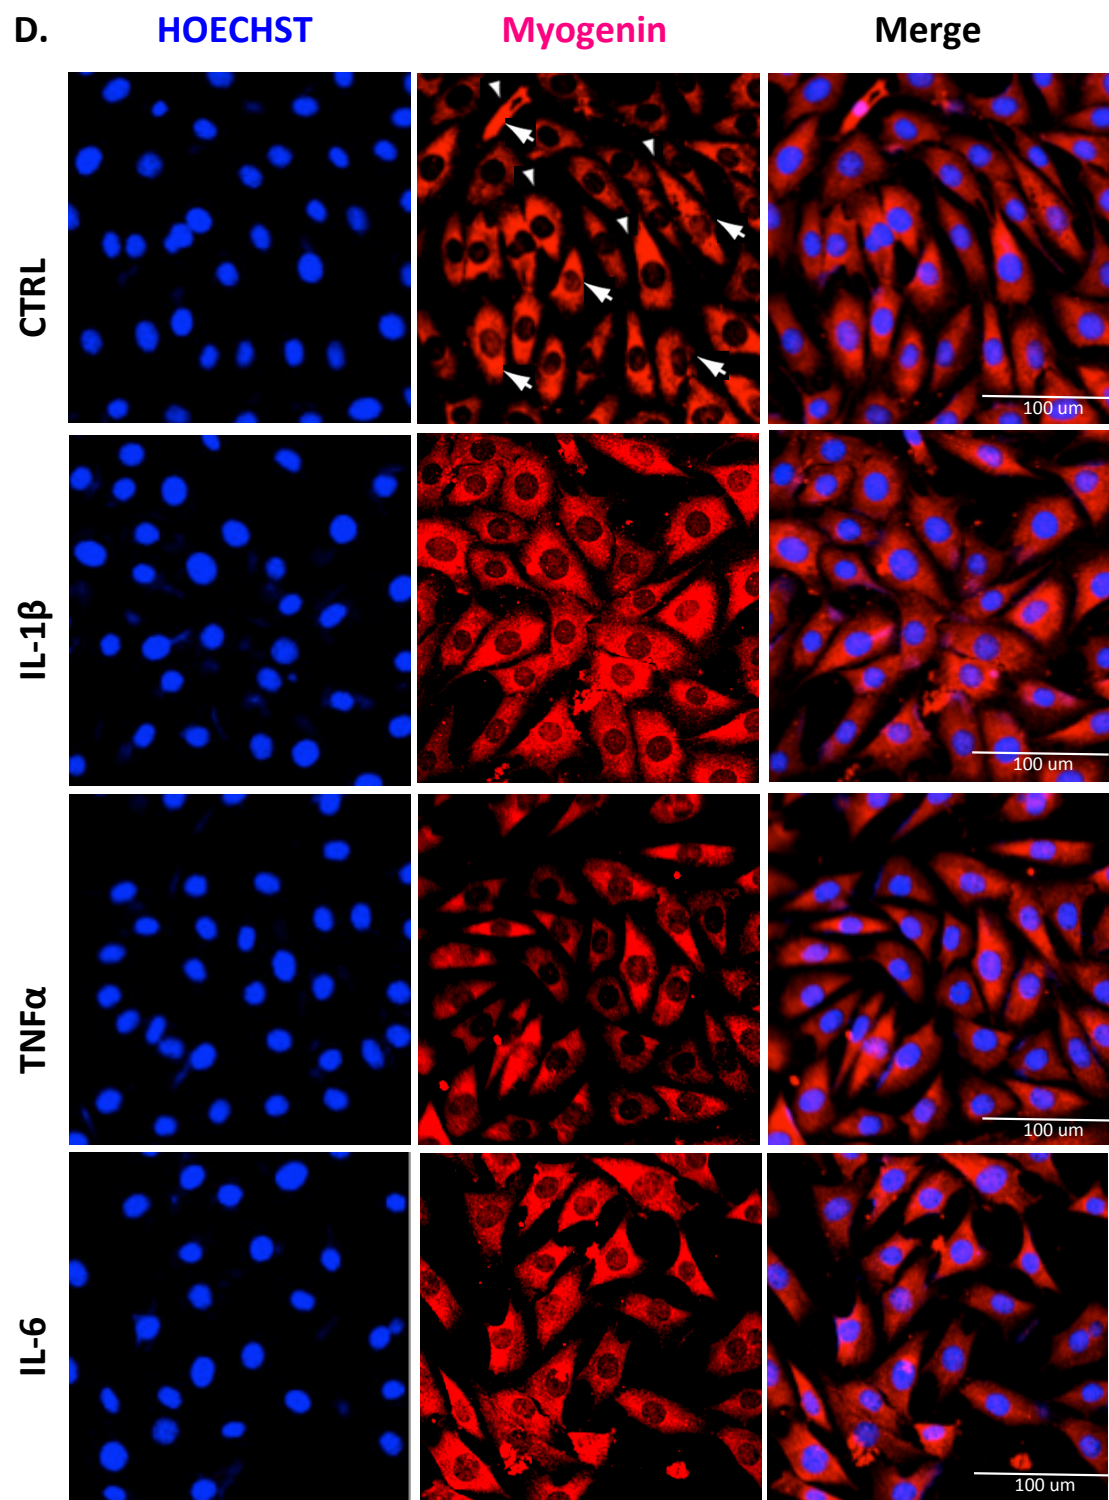

E.

HOECHST

MyoD

Merge

CTRL

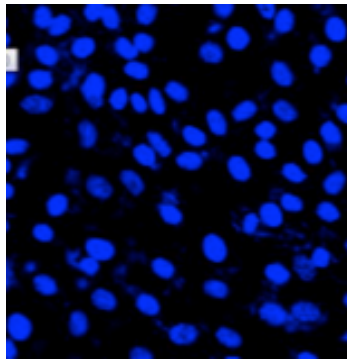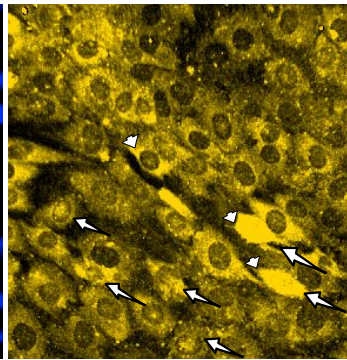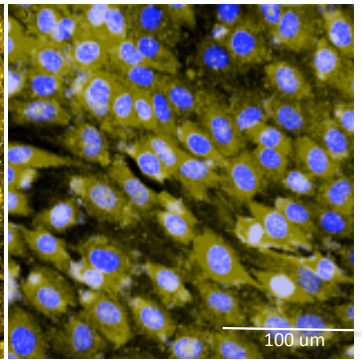

IL-1 $\beta$

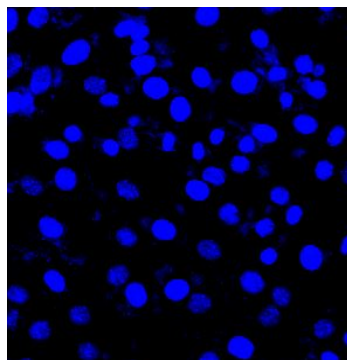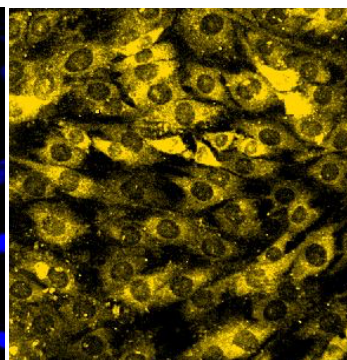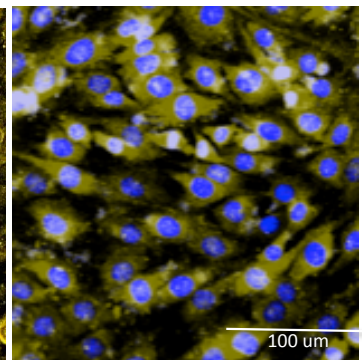

TNF $\alpha$

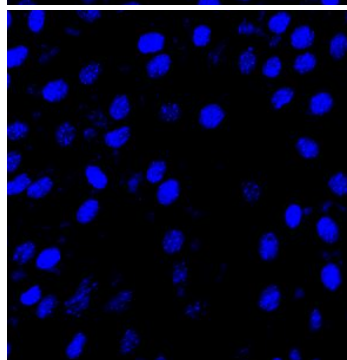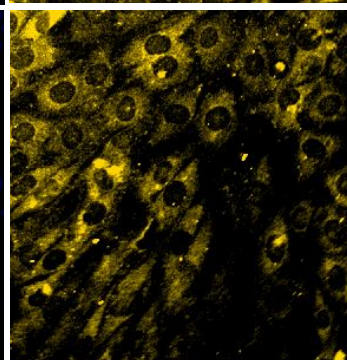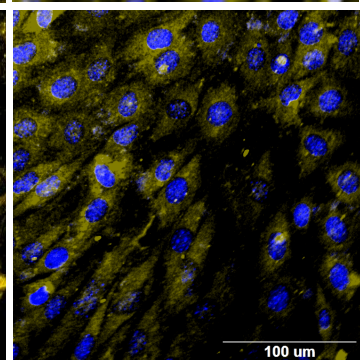

IL-6

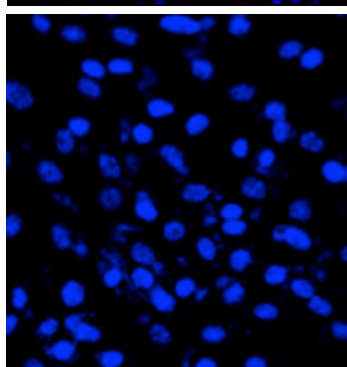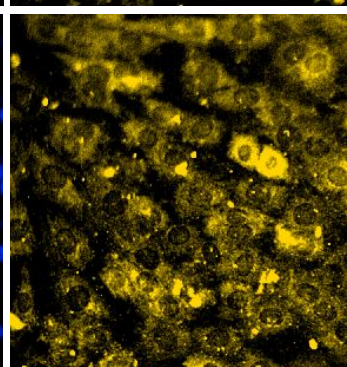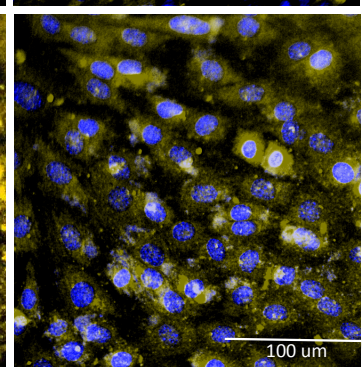

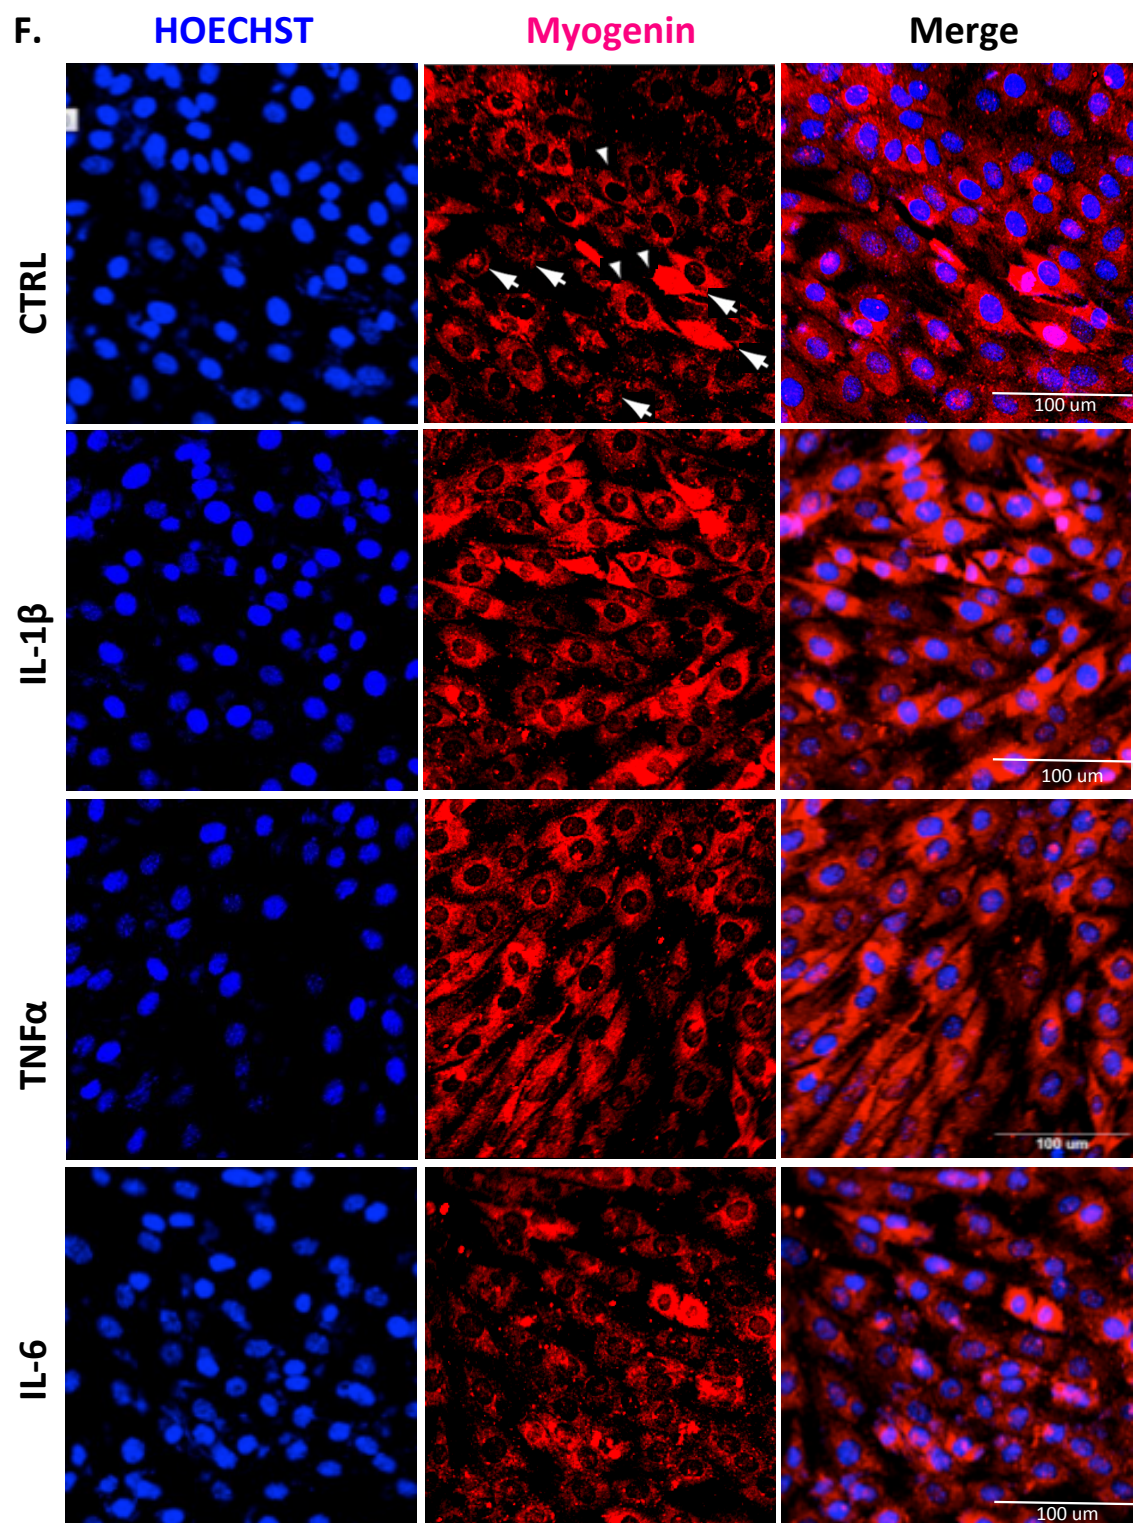

**Figure S1, related to Figures 4A and 5A.** Representative images of myogenic regulatory factors (MFRs) expression obtained by HCS for C2C12 cells (scale bar: 100  $\mu\text{m}$ ). Non-merged and merged images with Hoechst are presented for (A) Pax7, (B) Myf5, (C) MyoD and (D) myogenin at proliferated stage. Images for the commitment stage are presented for (E) MyoD and (F) myogenin. Examples for nuclear and cytoplasm localization of the MFRs are indicated by arrows and arrow-heads respectively, for the untreated cells (control).
